# Supplementary material for: Aberrant gene expression pattern in the glycolysis-cholesterol synthesis axis is linked with immune infiltration and prognosis in prostate cancer: A bioinformatics analysis
Source: PubMed Central journal article supplement — Medicine (Baltimore). 2022 Oct 28;101(43):e31416. doi: 10.1097/MD.0000000000031416 (PMC9622640; doi:10.1097/md.0000000000031416), 2022-10-28

Supplementary Figure 1: Batch profile estimation and correction using the "ComBat" algorithm. The raw (A) and combat (B) PCA plot was drawn.

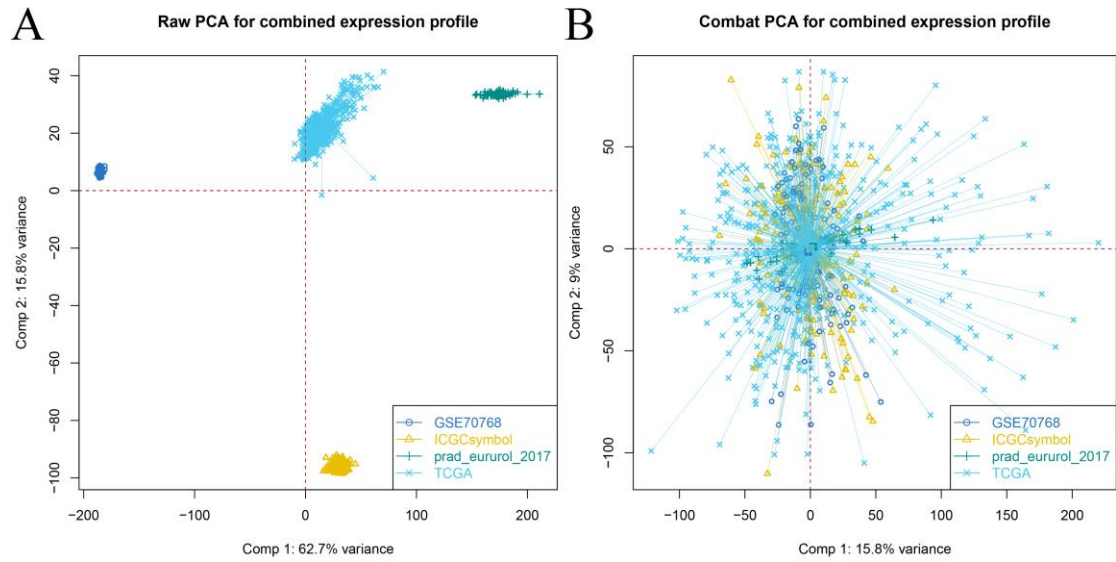

Supplement: medi-101-e31416-s001.pdf [file medi-101-e31416-s001.pdf]
